# Supplementary material for: Automatic speech analysis can predict loneliness
Source: Sci Rep. 2026 Apr 4;16:11604. doi: 10.1038/s41598-026-45965-5 (PMC13056942; doi:10.1038/s41598-026-45965-5)
Supplement: Supplementary file 1 — Supplementary Material 1 [file 41598_2026_45965_MOESM1_ESM.docx]

**Supporting Information**

The sound of loneliness: Prediction of perceived social isolation using automatic speech analysis

| **Table S1.** Results of machine learning experiments for loneliness (negative story) | | | | | | | |  |
| --- | --- | --- | --- | --- | --- | --- | --- | --- |
|  | **Females** | | | | **Males** | | | |
| Features set | Random Forest | | Randomised Baseline | | Random Forest | | Randomised Baseline | |
|  | MAE | *R2* | *M* (*SD*) | *p* | MAE | *R2* | *M* (*SD*) | *p* |
| Negative Story | 13.29 | -.11 | 13.34 (0.82) | .46 | 12.06 | -.12 | 12.34 (0.96) | .34 |
| Depression + Social Anxiety | 11.24 | .16 | 14.35 (1.48) | **.02** | 8.96 | .28 | 13.10 (1.47) | **<.01** |
| Negative Story + Depression + Social Anxiety | 11.80 | .09 | 13.40 (0.86) | **.04** | 11.53 | -.02 | 12.36 (0.97) | .16 |
| Baseline | 13.25 |  |  |  | 12.08 |  |  |  |

*Notes.* MAE: Mean absolute error of random forest regression

| **Table S2.** Results of machine learning experiments for loneliness (positive story) | | | | | | | | |  | |
| --- | --- | --- | --- | --- | --- | --- | --- | --- | --- | --- |
|  | **Females** | | | | **Males** | | | | | |
| Features set | Random Forest | | Randomised Baseline | | Random Forest | | Randomised Baseline | | | |
|  | MAE | *R2* | *M* (*SD*) | *p* | MAE | *R2* | *M* (*SD*) | *p* | |
| Positive Story | 14.13 | -.24 | 13.51 (0.89) | .70 | 12.43 | -.14 | 12.40 (0.97) | .48 | |
| Depression+ Social Anxiety | 11.24 | .16 | 14.35 (1.48) | **.02** | 8.96 | .28 | 13.10 (1.47) | **<.01** | |
| Positive Story + Depression + Social Anxiety | 12.26 | .02 | 13.44 (0.89) | .09 | 12.22 | -.12 | 12.46 (0.93) | .32 | | |
| Baseline | 13.25 |  |  |  | 12.08 |  |  |  | | |

*Notes. MAE: Mean absolute error of random forest regression*

| **Table S3.** TOP 5 highest spearman rank partial correlations between speech features and loneliness (corrected for depression) for the picture description | | | | | |
| --- | --- | --- | --- | --- | --- |
|  | **Females** | | | | |
| Speech features | Peak Frequency | Speech ratio | Amplitude mean absolute value | Amplitude kurtosis | Power spectrum ratio |
| Coefficient | -.23 | -.18 | -.17 | .14 | -.13 |
| *p* | .10 | .19 | .24 | .32 | .36 |
|  | **Males** | | | | |
| Speech features | Sound to noise ratio | Number of pauses | Total phonation time | Harmonics to noise ratio | Mean power |
| Coefficient | -.38 | -.31 | -.28 | -.27 | -.14 |
| *p* | **.01** | **< .05** | .07 | .08 | .36 |

| | **Table S4.** TOP 5 highest spearman rank partial correlations between speech features and loneliness (corrected for depression and social anxiety) for the picture description | | | | | | | --- | --- | --- | --- | --- | --- | |  | **Females** | | | | | | Speech features | Peak frequency | Speech Ratio | Amplitude mean absolute value | Amplitude kurtosis | Power spectrum ratio | | Coefficient | -.23 | -.18 | -.16 | .14 | -.13 | | *p* | .10 | .20 | .25 | .33 | .36 | |  | **Males** | | | | | | Speech features | Sound to noise ratio | Number of pauses | Total phonation time | Harmonics to noise ratio | Mean power | | Coefficient | -.39 | -.31 | -.28 | -.27 | -.15 | | *p* | **.01** | .05 | .08 | .09 | .35 | |  | | | | | |  | **Table S5.** TOP 5 highest spearman rank correlations between speech features and loneliness, for the negative story | | | | | | | --- | --- | --- | --- | --- | --- | |  | **Females** | | | | | | Speech features | Power spectrum ratio | Amplitude third moment | Mean power | Total power | Amplitude mean absolute value | | Coefficient | -.17 | .16 | .15 | .15 | .13 | | *p* | .23 | .24 | .29 | .29 | .34 | |  | **Males** | | | | | | Speech features | Ampltiude kurtosis | Harmonics to noise ratio | Speech ratio | Amplitude mean absolute value | Power pectrum ratio | | Coefficient | .39 | -.23 | -.19 | -.18 | -.17 | | *p* | **.010** | .13 | .22 | .24 | .28 |      | **Table S6.** TOP 5 highest spearman rank partial correlations between speech features and loneliness (corrected for depression), for the negative story | | | | | | | --- | --- | --- | --- | --- | --- | |  | **Females** | | | | | | Speech features | Power spectrum ratio | Sound to noise ratio | Peak frequency | Total phonation time | Number of pauses | | Coefficient | -.21 | -.15 | -.10 | -.07 | .07 | | *p* | .13 | .28 | .47 | .60 | .63 | |  | **Males** | | | | | | Speech features | Ampltiude kurtosis | Harmonics to noise ratio | Amplitude mean absolute value | Mean power | Total power | | Coefficient | .30 | -.28 | -.19 | -.17 | -.17 | | *p* | .05 | .07 | .22 | .29 | .29 |  | **Table S7.** TOP 5 highest spearman rank partial correlations between speech features and loneliness (corrected for depression and social anxiety), for the negative story | | | | | | | --- | --- | --- | --- | --- | --- | |  | **Females** | | | | | | Speech features | Power spectrum ratio | Sound to noise ratio | Peak frequency | Total phonation time | Number of pauses | | Coefficient | -.22 | -.16 | -.10 | -.08 | .07 | | *p* | .13 | .29 | .47 | .60 | .63 | |  | **Males** | | | | | | Speech features | Amplitude kurtosis | Harmonics to noise ratio | Amplitude mean absolute value | Mean power | Total power | | Coefficient | .30 | -.28 | -.20 | -.18 | -.18 | | *p* | .05 | .08 | .20 | .26 | .26 |  | **Table S8.** TOP 5 highest spearman rank correlations between speech features and loneliness, for the positive story | | | | | | | --- | --- | --- | --- | --- | --- | |  | **Females** | | | | | | Speech features | Sound to noise ratio | Amplitude third moment | Amplitude mean absolute value | Mean power | Total power | | Coefficient | -.21 | .18 | .15 | .14 | .14 | | *p* | .13 | .20 | .27 | .30 | .30 | |  | **Males** | | | | | | Speech features | Harmonics to noise ratio | Sound to noise ratio | Total phonation time | Number of paues | Maximum amlitude | | Coefficient | -.33 | -.20 | .16 | .14 | -.14 | | *p* | **.03** | .20 | .29 | .37 | .38 |   **Table S9.** TOP 5 highest spearman rank partial correlations between speech features and loneliness (corrected for depression), for the positive story   |  | **Females** | | | | | | --- | --- | --- | --- | --- | --- | | Speech features | Number of pauses | Sound to noise ratio | Power spectrum ratio | Total phonation time | Harmonics to noise ratio | | Coefficient | -.12 | -.12 | -.12 | -.09 | -.07 | | *p* | .40 | .41 | .41 | .52 | .64 | |  | **Males** | | | | | | Speech features | Harmonics to noise ratio | Sound to noise ratio | Max amplitude | Total phonation time | Number of pauses | | Coefficient | -.30 | -.19 | -.17 | .13 | .12 | | *p* | .05 | .24 | .28 | .41 | .43 | |
| --- | --- | --- | --- | --- | --- | --- | --- | --- | --- | --- | --- | --- | --- | --- | --- | --- | --- | --- | --- | --- | --- | --- | --- | --- | --- | --- | --- | --- | --- | --- | --- | --- | --- | --- | --- | --- | --- | --- | --- | --- | --- | --- | --- | --- | --- | --- | --- | --- | --- | --- | --- | --- | --- | --- | --- | --- | --- | --- | --- | --- | --- | --- | --- | --- | --- | --- | --- | --- | --- | --- | --- | --- | --- | --- | --- | --- | --- | --- | --- | --- | --- | --- | --- | --- | --- | --- | --- | --- | --- | --- | --- | --- | --- | --- | --- | --- | --- | --- | --- | --- | --- | --- | --- | --- | --- | --- | --- | --- | --- | --- | --- | --- | --- | --- | --- | --- | --- | --- | --- | --- | --- | --- | --- | --- | --- | --- | --- | --- | --- | --- | --- | --- | --- | --- | --- | --- | --- | --- | --- | --- | --- | --- | --- | --- | --- | --- | --- | --- | --- | --- | --- | --- | --- | --- | --- | --- | --- | --- | --- | --- | --- | --- | --- | --- | --- | --- | --- | --- | --- | --- | --- | --- | --- | --- | --- | --- | --- | --- | --- | --- | --- | --- | --- | --- | --- | --- | --- | --- | --- | --- | --- | --- | --- | --- | --- | --- | --- | --- | --- | --- | --- | --- | --- | --- | --- | --- | --- | --- | --- | --- | --- | --- | --- | --- | --- | --- | --- | --- | --- | --- | --- | --- | --- | --- | --- | --- | --- | --- | --- | --- | --- | --- | --- | --- | --- | --- | --- | --- | --- | --- | --- | --- | --- | --- | --- | --- | --- | --- | --- | --- | --- | --- | --- | --- | --- | --- | --- | --- | --- | --- | --- | --- | --- | --- | --- | --- | --- | --- | --- | --- | --- | --- | --- | --- | --- | --- | --- | --- | --- | --- | --- | --- | --- | --- | --- | --- | --- | --- | --- | --- | --- | --- | --- | --- | --- | --- | --- | --- | --- | --- | --- | --- | --- | --- | --- | --- | --- | --- | --- | --- | --- | --- | --- | --- | --- | --- | --- | --- | --- | --- | --- | --- | --- | --- |

| | **Table S10.** TOP 5 highest spearman rank partial correlations between speech features and loneliness (corrected for depression and social anxiety), for the positive story | | | | | | | --- | --- | --- | --- | --- | --- | |  | **Females** | | | | | | Speech features | Sound to noise ratio | Number of pauses | Power spectrum ratio | Total phonation time | Speech ratio | | Coefficient | -.12 | -.12 | -.12 | -.09 | -.07 | | *p* | .40 | .40 | .42 | .52 | .64 | |  | **Males** | | | | | | Speech features | Harmonics to noise ratio | Sound to noise ratio | Max amplitude | Total phonation time | Number of pauses | | Coefficient | -.30 | -.18 | -.17 | .14 | .13 | | *p* | .06 | .25 | .29 | .39 | .41 | |
| --- | --- | --- | --- | --- | --- | --- | --- | --- | --- | --- | --- | --- | --- | --- | --- | --- | --- | --- | --- | --- | --- | --- | --- | --- | --- | --- | --- | --- | --- | --- | --- | --- | --- | --- | --- | --- | --- | --- | --- | --- | --- | --- | --- | --- | --- | --- | --- | --- | --- | --- | --- | --- | --- | --- |

| **Table S11.** Overview and explanation of extracted speech features | |  |
| --- | --- | --- |
| **Speech features** | **Explanation** | **Category** |
| Speech ratio | Prosodic feature for verbal fluency from speech to non-speech proportion in the audio | Temporal |
| Speech interval | Speech segments uninterrupted by pauses between syllables to measure speech production efficiency | Temporal |
| Harmonics to noise ratio | Ratio between periodic and non-periodic components of speech which reflects voice quality | Source |
| Sound to noise ratio | Ratio between the power of speech signal and the power of background noise that reflects voice quality | Source |
| Mean F0 | Mean value of the fundamental frequency in voiced parts of the audio. Fundamental frequency. or pitch. quantifies speech signal’s periodic components for speech production assessment | Prosodic |
| Total phonation time | Total time duration of all words across all sentences | Temporal |
| Number of pauses | Total number of pauses longer than a time threshold between the syllables | Temporal |
| Average Mel-frequency cepstrals (MFCC) | Decomposition of Mel-frequency cepstral (MFCC) into a range of spectrum coefficients 1 through 20  MFC represents the short-term power spectrum of a sound | Spectral |
| Deltas | First derivative of the average MFCC values that presents the change in the power spectrum | Spectral |
| Delta deltas | First derivative of the average MFCC values that presents the rate of change in the power spectrum | Spectral |
| Espinola zero crossing metric | Measure for the rate at which speech signal crosses the zero reference and its deviation from the reference | Source |
| Average amplitude change | Variation of the signal amplitude over time | Source |
| Amplitude kurtosis | Kurtosis value for distribution of amplitudes i.e. shows how skewed or centred the distribution is | Source |
| Amplitude mean absolute value | Variation of the signal amplitude over time without change direction | Source |
| Amplitude third moment | Skewness of the signal amplitude over time | Source |
| Amplitude fourth moment | Kurtosis of the signal amplitude over time | Source |
| Max amplitude | Measure for the maximum disturbance of the air caused by the speech signal | Source |
| Peak frequency | Frequency of the maximum power value in signal frequency spectrum | Spectral |
| Power spectrum ratio | Power of the most powerful frequency relative to all other frequencies | Spectral |
| Mean power | Mean power transmitted by the signal | Source |
| Total power | Total power transmitted by the signal | Source |
| Jitter | Jitter is a measure of random perturbation in signal periodicity More representative when examining long vowels. Jitter calculation is based on relative jitter. | Source |

*Notes.* A total of 78 distinctive speech features are grouped into 22 main features
